# Supplementary material for: Single-molecule scale quantification reveals interactions underlying protein–protein interface: from forces to non-covalent bonds
Source: Royal Society of Chemistry journal article supplement (doi:10.1039/d3cp04351g), 2023-01-01
Supplement: d3cp04351g1.pdf [file d3cp04351g1.pdf]

## Supporting information

### Single-molecule Scale Quantification Reveals Interactions Underlying Protein-protein Interface: From Forces to Non-covalent Bonds

Heng Sun, Yichen Tian, Yuna Fu, Yongrong Lei, Yani Wang, Xinrui Yan, Xinyu Kuang, Jianhua Wang\*

### Dynamic force spectroscopy model to quantitatively analyze the interaction of BAX/Bcl-2 interface

the Bell-Evans (BE) model<sup>1,2</sup>

$$F = \frac{k_B T}{x_\beta} \times \ln \left( \frac{r \chi_\beta}{k_{off}^0 k_B T} \right) \quad (1)$$

$$\frac{1}{\tau(F)} = k_{off}^0 \exp \left( \frac{F \gamma}{k_B T} \right) \quad (2)$$

where  $k_B$  is the Boltzmann constant,  $T$  is the absolute temperature,  $\chi_\beta$  is the distance between bound and transition state,  $k_{off}^0$  is dissociation rate,  $r$  is loading rates,  $F$  is the external force.  $\tau$  is the bond lifetime, which is giving by Equation 2 using the  $k_{off}^0$  and  $x_\beta$  taken from Eq. 1. Generally, a higher association rate to the protein binding pocket and a longer bond lifetime indicates that the complex is stable, Fig. S3B. The height energy barrier ( $\Delta G_\beta$ ) can be estimated by putting the  $k_{off}^0$  into Eq. (3):

$$\Delta G_\beta = -k_B T \ln \frac{k_{off}^0 h}{k_B T} \quad (3)$$

where  $h$  is the Planck's constant.

The Dudko–Hummer–Szabo (DHS) model<sup>3,4</sup>

$$F = \frac{\Delta G_\beta}{\nu x_\beta} \left\{ 1 - \left[ \frac{k_B T}{\Delta G_\beta} \ln \frac{k_{off}^0 k_B T \exp\left(\frac{\Delta G_\beta}{k_B T}\right)}{x_\beta r_F} \right]^\nu \right\} \quad (4)$$

In this model,  $\nu$  represents the free-energy profile, giving the linear cubic model ( $\nu = 2/3$ ), the cusp model ( $\nu = 1/2$ ), compared to the Bell–Evans formula ( $\nu = 1$ ).  $\Delta G_\beta$  is the height energy barrier. The bond lifetime is approximated by:

$$\tau(F) \cong \frac{\left[ \frac{\pi}{2} (\langle F^2 \rangle - \langle F \rangle^2) \right]^{1/2}}{r(F)} \quad (5)$$

where  $\langle F^2 \rangle$  is the mean squared rupture force at a given loading rate  $r(F)$ , Fig. S3C.

### the Frididdle-Noy-De Yoreo (FNDY) model <sup>5</sup>

The process of bonds rupture goes through two phases: an equilibrium phase at lower LR, where the bonds break and rebinds, and a kinetic phase at higher LRs, where the bonds break irreversibly. The transition between the two phases occurs at equilibrium forces ( $F_{eq}$ ) and is described with Eq. 6:

$$F_{eq} = \sqrt{2k_{eff}\Delta G_{bu}} \quad (6)$$

where  $F_{eq}$  is equilibrium force,  $k_{eff}$  is the effective spring constant of the entire system (see Fig. 2H from main text);  $\Delta G_{bu}$  is equilibrium free energy and represents the energy difference between the unbound and bound states. The unbinding force and dissociation rate are defined by the Eq. 7 and 8:

$$F \cong F_{eq} + f_\beta \ln \left( 1 + e^{-\gamma} \frac{r}{k_{off}(F_{eq})f_\beta} \right) \quad (7)$$

$$k_{off} = \frac{k_{off}(F_{eq})}{\exp \left[ \frac{1}{k_B T} \left( F_{eq} x_\beta - \frac{k_{eff} x_\beta^2}{2} \right) \right]} \quad (8)$$

where  $f_\beta = \frac{k_B T}{x_\beta}$  is the thermal scaling factor and  $\gamma = 0.577$  is Euler's constant.

### Estimation of association rate for BAX/Bcl-2

A relationship between the interaction time and BP is described with Eq. 9 <sup>6,7</sup>:

$$BP = A * \left[ 1 - \exp\left(\frac{-(t - t_0)}{\tau}\right) \right] \quad (9)$$

where  $A$  is the maximal BP and  $t_0$  is the lag time,  $\tau$  is the time required for the half-maximal binding probability. By assuming the BAX/Bcl-2 follows pseudo-first-order dynamics, the value of  $k_{on}$  is estimated by applying the expression:

$$k_{on} = \frac{V_{eff} \cdot N_A}{n_b \tau} \quad (10)$$

where  $V_{eff}$  is the effective volume of a sphere describing the protein binding pair,  $N_A$  is Avogadro's number, and  $n_b$  is the number of binding partners.

### Poisson Statistical Method

We calculated the strength of the single bond between the BAX/Bcl-2 interfaces using Poisson statistics, which is similar to the approach we previously used in the single molecule force analysis <sup>8, 9</sup>. At the maximum unbinding force distribution, the distribution of the number of multiple interacting pairs follows a Poisson distribution, expressed as:

$$P(N) = \frac{e^{-\lambda} \lambda^N}{N!} \quad (11)$$

$$\sigma_n^2 = \lambda \quad (12)$$

where  $P(N)$  is the probability of forming  $N$  number of binding bonds,  $\lambda$  and  $\sigma_n^2$  represent the mean and variance of the multiple bonds formed in the unbinding events, respectively. Then the unbinding force values for each set of measurements will follow the following equation:

$$F_{av} = \lambda F_i + F_0 \quad (13)$$

$$\sigma_F^2 = (\sigma_n F_i)^2 = \lambda F_i^2 \quad (14)$$

where  $F_i$  is the single bond specific force,  $F_0$  is the non-specific force,  $F_{av}$  is the mean value of unbinding force and  $\sigma_F^2$  is the variance of unbinding force. Therefore, we obtain the following expression:

$$\sigma_F^2 = \lambda F_i^2 = F_{av} F_i - F_i F_0 \quad (15)$$

The measurements were performed at several randomly selected points corresponding to different substrate locations, each providing 50-60 individual force measurements (Table S2). The mean and variance were then calculated from the measured forces, a curve of variance versus mean was plotted, and  $F_i$  and  $F_0$  can be derived from the linear regression (see Fig. 5A from main text).

## Characterization of surface energy and surface parameters of the BAX/Bcl-2 interface

By performing contact angle analysis on the surface using three different probe liquids (water, ethylene glycol, and diiodomethane) with known surface tension ( $\gamma$ ), the values of the surface energy components were determined by combining the three equations<sup>10-14</sup>:

$$0.5(1 + \cos\theta)\gamma_L = \sqrt{\gamma_S^{LW}\gamma_L^{LW}} + \sqrt{\gamma_S^+\gamma_L^-} + \sqrt{\gamma_S^-\gamma_L^+} \quad (16)$$

where  $\theta$  is the contact angle formed between a droplet of liquid (L) and the surface of component (S),  $\gamma$  is the surface tension, LW is the component of Lifshitz–van der Waals, + and – are electron acceptor and electron donor component, respectively.

The values of surface tension of the three test liquids are displayed in Table S3.

According to the theory of Van Oss<sup>10, 12, 15, 16</sup>, the interfacial free energy of interaction between two molecules in water is expressed as:

$$\begin{aligned} \Delta G_{i(W)i} &= 2(\sqrt{\gamma_1^{LW}\gamma_w^{LW}} + \sqrt{\gamma_2^{LW}\gamma_w^{LW}} - \sqrt{\gamma_1^{LW}\gamma_2^{LW}} - \gamma_w^{LW} + \sqrt{\gamma_w^+(\sqrt{\gamma_1^-} + \sqrt{\gamma_2^-} - \sqrt{\gamma_w^-})} + \sqrt{\gamma_w^-(\sqrt{\gamma_1^+} \\ &\quad - \sqrt{\gamma_1^+\gamma_2^-} - \sqrt{\gamma_2^+\gamma_1^-}) \end{aligned} \quad (17)$$

where  $\gamma_1$  and  $\gamma_2$  are surface energy of BAX and Bcl-2 molecule, respectively.  $\gamma_w$  is the surface energy of water.

## Supplementary Figures

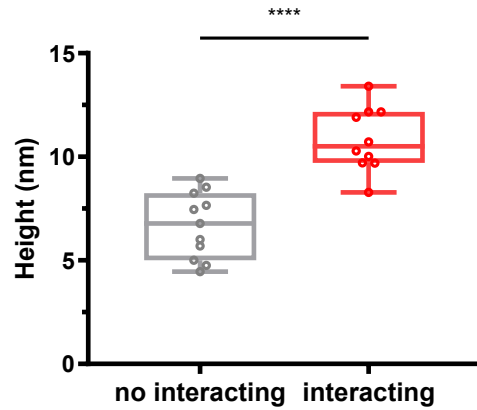

Figure S1. Comparison between height of the BAX interacting with BAX versus the not interacting. The height values were extracted from the topography of Bcl-2 probed with BAX-functionalized tips with contact mode. The BAX/Bcl-2 interacting possess a significantly higher height compared to the not interacting. The min/ max of the box the 25th and 75th percentiles respectively, and the whiskers the s.d. of the mean value. The line in the box indicates the median. \*\*\*\* indicates p-values <0.0001 on unpaired sample t tests.

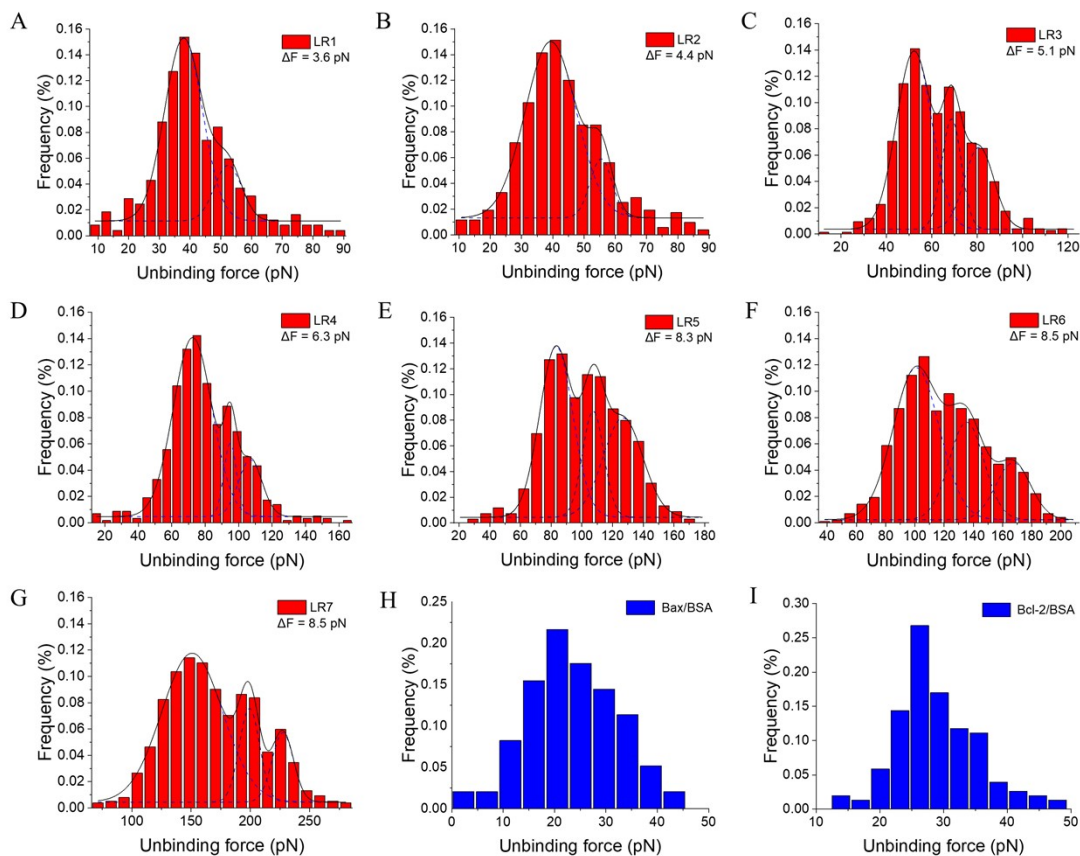

Figure S2. Unbinding forces frequency distributions of binding events. (A-G) frequency distributions of unbinding forces in LR ranges #1-7 for BAX/Bcl-2 interactions. Multi-peak Gaussian fits are used to extract the most probable unbinding force for each LR range. (H-I) Frequency distribution of unbinding force for non-specific binding events at a loading rate of 1  $\mu\text{m/s}$ . (H) BAX/BSA. (I) Bcl-2/BSA.

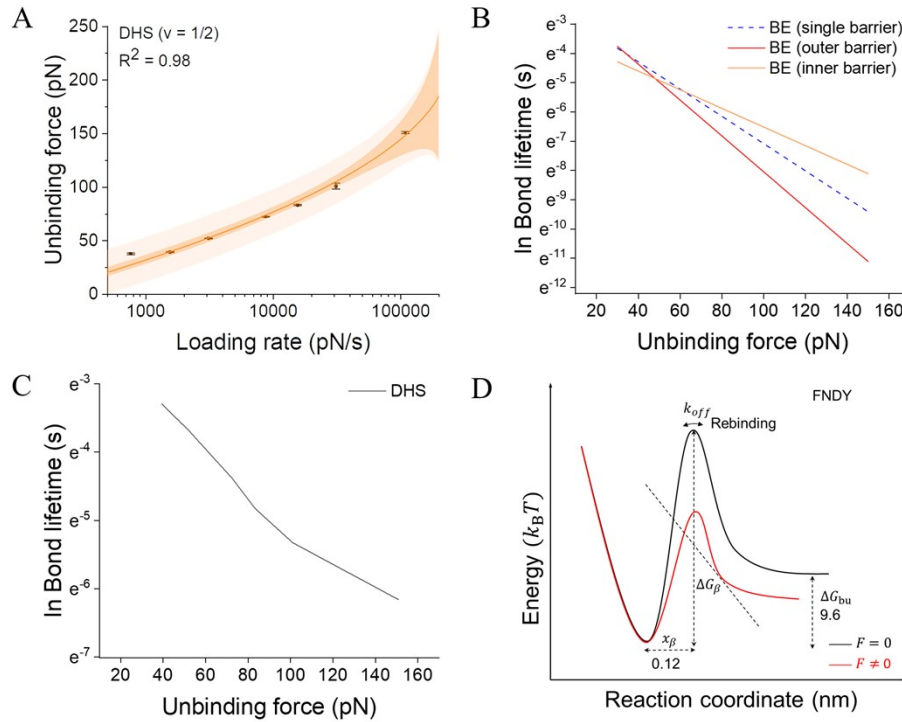

Figure S3. (A) Force spectra are fitted with the DHS model,  $\nu = 1/2$ . (B and C) The relationship between bond lifetime and unbinding force for Bell-Evans (B) and DHS (C) model. (D) Conceptual cartoons of the binding energy landscape of single BAX/Bcl-2 bonds, describing one barrier with possible rebinding.

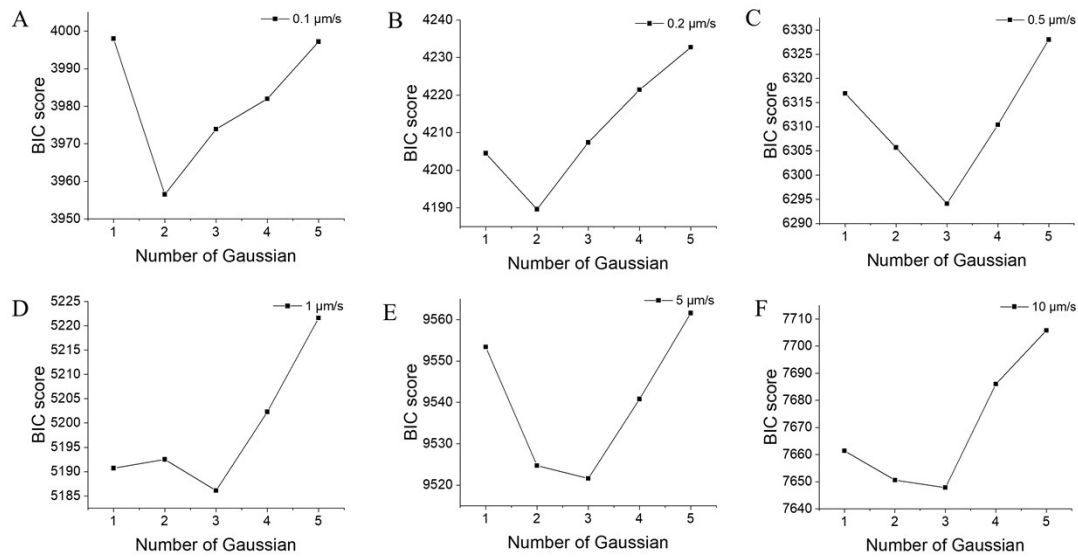

Figure S4. (A-F) Bayesian information criterion (BIC) predicts the optimal number of Gaussians in the unbinding forces histograms in Fig. S2.

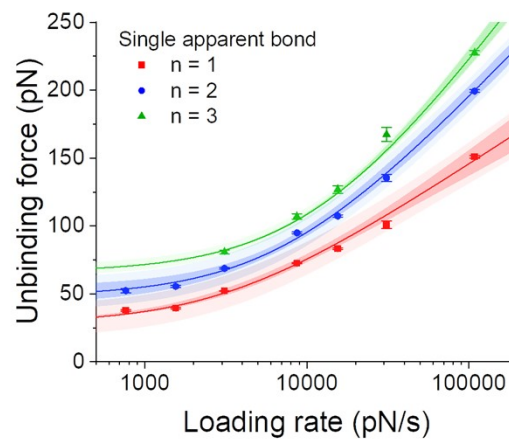

Figure S5. Most probable unbinding forces as a function of LR are plotted on a logarithmic scale. Force spectra data are fitted with single apparent bonds FNDY model.  $F_{eq}$ ,  $x_{\beta}$ , and  $k_{off}(F_{eq})$  are set as free parameters fits for each set of independent single bonds. The error bars represent the Gaussian-fit SD of the corresponding histogram. Darker shaded areas represent 95% confidence intervals, and lighter shaded areas represent 95% of prediction intervals of the fit.

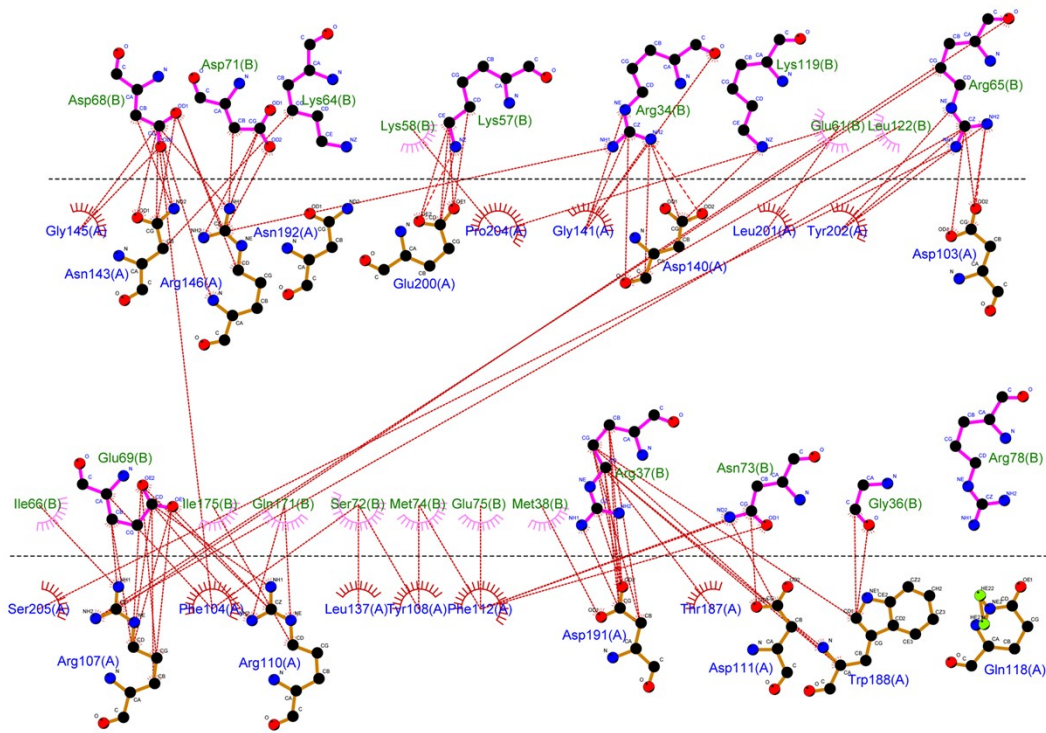

Figure S6 Residues of BAX involved in the hydrophobic interaction network are indicated in green, whereas Bcl-2 is indicated in blue. The hydrophobic network diagram is generated using LIGPLOT.

### Supplementary Tables

Table S1 Kinetic and energy landscape parameters obtained with FNDY models for multiple bonds between BAX and Bcl-2 proteins, where each set of data was fitted individually under the assumption of single apparent bonds acting.

| No. of bonds | $F_{eq}$ (pN) | $f_{\beta}$ (pN) | $k_{off}(F_{eq})$ (S <sup>-1</sup> ) | $k_{off}$ (S <sup>-1</sup> ) | $x_{\beta}$ (nm) | $\tau$ (S) | $\Delta G_{bu}$ ( $k_B T$ ) |
|--------------|---------------|------------------|--------------------------------------|------------------------------|------------------|------------|-----------------------------|
| n = 1        | 28.02 ± 0.54  | 34.25 ± 1.32     | 54.31 ± 4.24                         | ± 24.38 ± 0.07               | ± 0.12 ± 0.01    | ± 0.041    | 9.6 ± 1.11                  |
| n = 2        | 48.18 ± 3.84  | 58.71 ± 6.87     | 75.29 ± 13.29                        | ± 33.74 ± 0.04               | ± 0.07 ± 0.01    | ± 0.030    | 26.57 ± 4.48                |
| n = 3        | 66.02 ± 3.93  | 82.2 ± 3.57      | 96.29 ± 11.36                        | ± 43.52 ± 1.25               | ± 0.05 ± 0.004   | ± 0.023    | 42.35 ± 5.64                |



|                    |                 |                                   |
|--------------------|-----------------|-----------------------------------|
| n = 1 <sup>a</sup> | 34.25 ±<br>1.32 | 24.38 ± 0.12 ± 0.041<br>0.07 0.01 |
| n = 2 <sup>a</sup> | 58.71 ±<br>6.87 | 15.67 ± 0.14 ± 0.064<br>0.69 0.02 |
| n = 3 <sup>a</sup> | 82.2 ±<br>3.57  | 9.39 ± 0.15 ± 0.106<br>0.61 0.01  |

$$f_{\beta}^{app} = \left( \frac{k_B T}{\frac{\chi_{\beta}}{n}} \right)$$

<sup>a</sup> the transition state distance ( $\chi_{\beta}$ ) is corrected using n,

Table S2. Unbinding forces between BAX/Bcl-2 pairs at a loading rate of 1  $\mu\text{m/s}$ . Error propagation is used to determine the uncertainty of the calculated values.

| Mean force ( $\lambda$ ) | Variance of force ( $\sigma_F^2$ ) | Number of sets | Mean number bonds (n) |
|--------------------------|------------------------------------|----------------|-----------------------|
| 67.42 ± 5.1              | 26.64                              | 48             | 2.77 ± 0.23           |
| 73.32 ± 11.3             | 130.26                             | 52             | 3.01 ± 0.48           |
| 76.08 ± 14.7             | 219.35                             | 53             | 3.13 ± 0.62           |
| 77.27 ± 14.0             | 199.88                             | 52             | 3.18 ± 0.59           |
| 79.18 ± 16.3             | 269.38                             | 51             | 3.26 ± 0.68           |
| 82.53 ± 18.1             | 333.95                             | 58             | 3.40 ± 0.75           |
| 86.45 ± 20.9             | 449.07                             | 51             | 3.56 ± 0.87           |
| 92.30 ± 23.7             | 569.78                             | 57             | 3.79 ± 0.98           |
| 103.94 ± 29.9            | 910.79                             | 60             | 4.27 ± 1.24           |

Table S3. Surface tension components of the three test liquids used for contact angle measurements <sup>14</sup>.

| Test liquids    | Surface tension values ( $\text{mJ}\cdot\text{m}^{-2}$ ) |            |            |            |
|-----------------|----------------------------------------------------------|------------|------------|------------|
|                 | $\gamma^{LW}$                                            | $\gamma^+$ | $\gamma^-$ | $\gamma_L$ |
| Water           | 21.8                                                     | 25.5       | 25.5       | 72.8       |
| ethylene glycol | 29.0                                                     | 1.9        | 47.0       | 48.0       |

|               |      |     |     |      |
|---------------|------|-----|-----|------|
| diiodomethane | 50.5 | 0.0 | 0.0 | 50.8 |
|---------------|------|-----|-----|------|

Table S4. The values of contact angle measured for substrates in the presence of water ( $\theta_W$ ), ethylene glycol ( $\theta_{EG}$ ) and diiodomethane ( $\theta_D$ ) and the calculated surface energy components.

| Substrate | Contact Angle (°) |               |             | Surface energy components (mJ·m <sup>-2</sup> ) |             |             |
|-----------|-------------------|---------------|-------------|-------------------------------------------------|-------------|-------------|
|           | $\theta_W$        | $\theta_{EG}$ | $\theta_D$  | $\gamma^{LW}$                                   | $\gamma^+$  | $\gamma^-$  |
| Au        | 88.07 ± 2.0       | 54.30 ± 6.8   | 34.84 ± 2.7 | 42.02 ± 1.0                                     | 0.01 ± 0.01 | 2.06 ± 0.8  |
| Bcl-2     | 52.12 ± 3.8       | 31.12 ± 3.5   | 40.02 ± 2.3 | 39.47 ± 0.7                                     | 0.17 ± 0.1  | 32.27 ± 2.6 |
| BAX/Bcl-2 | 66.89 ± 3.1       | 42.49 ± 3.3   | 40.13 ± 2.8 | 39.89 ± 1.1                                     | 0.18 ± 0.05 | 14.49 ± 1.7 |
| BSA/Bcl-2 | 48.51 ± 1.5       | 32.72 ± 4.8   | 40.59 ± 2.4 | 39.10 ± 1.0                                     | 0.11 ± 0.03 | 34.31 ± 4.8 |

Table S5 The HADDOCK predicted docking score for BAX/Bcl-2 complexes

| HADDOCK parameters                    | BAX/Bcl-2     |
|---------------------------------------|---------------|
| HADDOCK score                         | -132.7 ± 5.6  |
| Cluster size                          | 36            |
| RMSD (Å)                              | 0.6 ± 0.4     |
| Van der Waals energy                  | -54.8 ± 5.8   |
| Electrostatic energy                  | -524.7 ± 23.8 |
| De-solvation energy                   | 16.8 ± 1.8    |
| Restraints violation energy           | 102.4 ± 15.8  |
| Buried Surface Area (Å <sup>2</sup> ) | 2369.9 ± 71.9 |
| Z-Score                               | -1.4          |

## Reference

1. G. I. Bell, *SCIENCE*, 1978, **200**, 618-627.
2. E. Evans and K. Ritchie, *Biophysical Journal*, 1997, **72**, 1541-1555.
3. O. K. Dudko, G. Hummer and A. Szabo, *Phys Rev Lett*, 2006, **96**, 108101.
4. O. K. Dudko, G. Hummer and A. Szabo, *PNAS*, 2008, **108**, 15755–15760.
5. R. W. Friddle, A. Noy and J. J. De Yoreo, *Proc Natl Acad Sci U S A*, 2012, **109**, 13573-13578.
6. J. Yang, S. J. L. Petitjean, M. Koehler, Q. Zhang, A. C. Dumitru, W. Chen, S. Derclaye, S. P. Vincent, P. Soumillion and D. Alsteens, *Nat Commun*, 2020, **11**, 4541.
7. S. J. L. Petitjean, W. Chen, M. Koehler, R. Jimmidi, J. Yang, D. Mohammed, B. Juniku, M. L. Stanifer, S. Boulant, S. P. Vincent and D. Alsteens, *Nat Commun*, 2022, **13**, 2564.
8. Y. Wang, J. Wang, S. Huang, C. Liu and Y. Fu, *Int J Biol Macromol*, 2019, **134**, 28-35.
9. Y. Fu, J. Wang, Y. Wang and H. Sun, *Biomolecules*, 2022, **12**.
10. N. Subhi, A. R. D. Verliefde, V. Chen and P. Le-Clech, *Journal of Membrane Science*, 2012, **403-404**, 32-40.
11. H. Barkai, E. Soumya, M. Sadiki, B. Mounyr and K. S. Ibsouda, *Journal of Adhesion Science and Technology*, 2016, **31**, 726-734.
12. C. J. Van Oss, M. K. Chaudhury and R. J. Good, *Chemical reviews*, 1988, **88**, 927-941.
13. C. Van Oss, *Colloids and Surfaces A: Physicochemical and Engineering Aspects*, 1993, **78**, 1-49.
14. C. Van Oss and R. Giese, *Clays and Clay minerals*, 1995, **43**, 474-477.
15. C. J. van Oss, R. F. Giese, P. M. Bronson, A. Docoslis, P. Edwards and W. T. Ruyechan, *Colloids and Surfaces B: Biointerfaces*, 2003, **30**, 25-36.
16. C. J. van Oss, A. Docoslis and R. F. Giese Jr, *Colloids and Surfaces B: Biointerfaces*, 2001, **22**, 285-300.
